# Supplementary material for: Is the Magnesium Content in Food Supplements Consistent with the Manufacturers’ Declarations?
Source: MDPI journal article supplement (doi:10.3390/nu13103416), 2021-09-28
Supplement: s1 [file s1]

# Is The Magnesium Content In Dietary Supplements Consistent With The Manufacturers' Declarations?

Anna Puścion-Jakubik <sup>\*,#</sup>, Natalia Bartosiewicz <sup>#</sup> and Katarzyna Socha

Department of Bromatology, Faculty of Pharmacy with the Division of Laboratory Medicine, Medical University of Białystok, Mickiewicza 2D Street, 15-222 Białystok, Poland; natalia\_bartosiewicz@wp.pl (N.B.); katarzyna.socha@umb.edu.pl (K.S.)

\* Correspondence: anna.puscion-jakubik@umb.edu.pl; Tel.: +48-8574-854-69

# These authors contributed equally to this work.

**Table S1.** Characteristics of the studied dietary supplements.

| Number | Declared content of Mg in 1 portion [mg] | Form           | Price         | Declared content of Mg in 1 portion [mg] | Amount of minerals             | Chemical form          |
|--------|------------------------------------------|----------------|---------------|------------------------------------------|--------------------------------|------------------------|
| 1.     | 17                                       | Tablets        | <10           | Less than 100 mg                         | Multicomponent preparations    | Magnesium carbonate    |
| 2.     | 28.5                                     | Jelly beans    | from 10 to 20 | Less than 100 mg                         | Multicomponent preparations    | Magnesium carbonate    |
| 3.     | 30                                       | Coated tablets | from 10 to 20 | Less than 100 mg                         | Multicomponent preparations    | Magnesium citrate      |
| 4.     | 30                                       | Capsules       | from 10 to 20 | Less than 100 mg                         | Multicomponent preparations    | Magnesium citrate      |
| 5.     | 30                                       | Tablets        | from 10 to 20 | Less than 100 mg                         | Multicomponent preparations    | Magnesium carbonate    |
| 6.     | 30                                       | Tablets        | from 10 to 20 | Less than 100 mg                         | Only magnesium (or vitamin B6) | Several chemical forms |
| 7.     | 30                                       | Tablets        | from 10 to 20 | Less than 100 mg                         | Only magnesium (or vitamin B6) | Magnesium lactate      |
| 8.     | 35                                       | Tablets        | from 10 to 20 | Less than 100 mg                         | Only magnesium (or vitamin B6) | Magnesium citrate      |

|     |       |                      |               |                  |                                |                        |
|-----|-------|----------------------|---------------|------------------|--------------------------------|------------------------|
| 9.  | 37.5  | Tablets              | <10           | Less than 100 mg | Only magnesium (or vitamin B6) | Magnesium citrate      |
| 10. | 45    | Effervescent tablets | from 10 to 20 | Less than 100 mg | Only magnesium (or vitamin B6) | Magnesium carbonate    |
| 11. | 45    | Effervescent tablets | from 10 to 20 | Less than 100 mg | Multicomponent preparations    | Magnesium carbonate    |
| 12. | 50    | Coated tablets       | from 10 to 20 | Less than 100 mg | Multicomponent preparations    | Magnesium citrate      |
| 13. | 50    | Coated tablets       | from 10 to 20 | Less than 100 mg | Multicomponent preparations    | Magnesium oxide        |
| 14. | 50    | Coated tablets       | <10           | Less than 100 mg | Only magnesium (or vitamin B6) | Magnesium lactate      |
| 15. | 50    | Coated tablets       | from 10 to 20 | Less than 100 mg | Multicomponent preparations    | Magnesium carbonate    |
| 16. | 50    | Capsules             | >20           | Less than 100 mg | Multicomponent preparations    | Several chemical forms |
| 17. | 50    | Tablets              | <10           | Less than 100 mg | Only magnesium (or vitamin B6) | Magnesium citrate      |
| 18. | 50    | Coated tablets       | <10           | Less than 100 mg | Multicomponent preparations    | Magnesium carbonate    |
| 19. | 51    | Tablets              | <10           | Less than 100 mg | Multicomponent preparations    | Magnesium citrate      |
| 20. | 51    | Tablets              | <10           | Less than 100 mg | Only magnesium (or vitamin B6) | Magnesium lactate      |
| 21. | 56.25 | Tablets              | from 10 to 20 | Less than 100 mg | Multicomponent preparations    | Magnesium oxide        |
| 22. | 56.25 | Tablets              | from 10 to 20 | Less than 100 mg | Only magnesium (or vitamin B6) | Magnesium lactate      |
| 23. | 56.25 | Powders              | from 10 to 20 | Less than 100 mg | Multicomponent preparations    | Magnesium carbonate    |
| 24. | 56.25 | Tablets              | <10           | Less than 100 mg | Only magnesium (or vitamin B6) | Magnesium carbonate    |
| 25. | 56.25 | Coated tablets       | <10           | Less than 100 mg | Only magnesium (or vitamin B6) | Magnesium lactate      |
| 26. | 56.25 | Dragees              | >20           | Less than 100 mg | Multicomponent preparations    | Magnesium carbonate    |
| 27. | 56.5  | Coated tablets       | <10           | Less than 100 mg | Multicomponent preparations    | Magnesium carbonate    |
| 28. | 58    | Capsules             | from 10 to 20 | Less than 100 mg | Only magnesium (or vitamin B6) | Magnesium lactate      |
| 29. | 60    | Coated tablets       | <10           | Less than 100 mg | Multicomponent preparations    | Magnesium carbonate    |
| 30. | 60    | Effervescent tablets | from 10 to 20 | Less than 100 mg | Multicomponent preparations    | Magnesium carbonate    |
| 31. | 60    | Tablets              | <10           | Less than 100 mg | Only magnesium (or vitamin B6) | Several chemical forms |

|     |       |                      |               |                  |                                |                            |
|-----|-------|----------------------|---------------|------------------|--------------------------------|----------------------------|
| 32. | 60    | Powders              | from 10 to 20 | Less than 100 mg | Multicomponent preparations    | Magnesium carbonate        |
| 33. | 60    | Effervescent tablets | from 10 to 20 | Less than 100 mg | Multicomponent preparations    | Magnesium lactate          |
| 34. | 60    | Effervescent tablets | from 10 to 20 | Less than 100 mg | Multicomponent preparations    | Magnesium lactate          |
| 35. | 60    | Tablets              | <10           | Less than 100 mg | Multicomponent preparations    | Magnesium hydroxide        |
| 36. | 60    | Tablets              | <10           | Less than 100 mg | Only magnesium (or vitamin B6) | Magnesium oxide            |
| 37. | 60    | Tablets              | from 10 to 20 | Less than 100 mg | Only magnesium (or vitamin B6) | Magnesium carbonate        |
| 38. | 60    | Effervescent tablets | from 10 to 20 | Less than 100 mg | Only magnesium (or vitamin B6) | Magnesium lactate          |
| 39. | 62.5  | Liquids              | >20           | Less than 100 mg | Only magnesium (or vitamin B6) | Several chemical forms     |
| 40. | 70    | Tablets              | from 10 to 20 | Less than 100 mg | Only magnesium (or vitamin B6) | Magnesium carbonate        |
| 41. | 72    | Tablets              | <10           | Less than 100 mg | Multicomponent preparations    | Several chemical forms     |
| 42. | 72    | Tablets              | >20           | Less than 100 mg | Only magnesium (or vitamin B6) | Magnesium glycerophosphate |
| 43. | 75    | Liquids              | <10           | Less than 100 mg | Only magnesium (or vitamin B6) | Magnesium citrate          |
| 44. | 75    | Tablets              | from 10 to 20 | Less than 100 mg | Only magnesium (or vitamin B6) | Magnesium citrate          |
| 45. | 90    | Liquids              | from 10 to 20 | Less than 100 mg | Only magnesium (or vitamin B6) | Several chemical forms     |
| 46. | 93.75 | Capsules             | from 10 to 20 | Less than 100 mg | Only magnesium (or vitamin B6) | Magnesium citrate          |
| 47. | 93.75 | Effervescent tablets | <10           | Less than 100 mg | Multicomponent preparations    | Magnesium carbonate        |
| 48. | 93.75 | Capsules             | >20           | Less than 100 mg | Multicomponent preparations    | Several chemical forms     |
| 49. | 94    | Capsules             | from 10 to 20 | Less than 100 mg | Only magnesium (or vitamin B6) | Several chemical forms     |
| 50. | 100   | Capsules             | from 10 to 20 | 100 - 200 mg     | Only magnesium (or vitamin B6) | Magnesium bisglycinate     |
| 51. | 100   | Tablets              | >20           | 100 - 200 mg     | Multicomponent preparations    | Magnesium carbonate        |
| 52. | 100   | Tablets              | >20           | 100 - 200 mg     | Only magnesium (or vitamin B6) | Magnesium citrate          |

|     |        |                      |               |              |                                |                        |
|-----|--------|----------------------|---------------|--------------|--------------------------------|------------------------|
| 53. | 100    | Coated tablets       | <10           | 100 - 200 mg | Only magnesium (or vitamin B6) | Magnesium citrate      |
| 54. | 100    | Capsules             | from 10 to 20 | 100 - 200 mg | Only magnesium (or vitamin B6) | Magnesium bisglycinate |
| 55. | 100    | Effervescent tablets | from 10 to 20 | 100 - 200 mg | Only magnesium (or vitamin B6) | Magnesium bisglycinate |
| 56. | 100    | Capsules             | >20           | 100 - 200 mg | Only magnesium (or vitamin B6) | Magnesium bisglycinate |
| 57. | 100    | Tablets              | >20           | 100 - 200 mg | Multicomponent preparations    | Magnesium oxide        |
| 58. | 100    | Tablets              | <10           | 100 - 200 mg | Multicomponent preparations    | Magnesium carbonate    |
| 59. | 100    | Effervescent tablets | <10           | 100 - 200 mg | Only magnesium (or vitamin B6) | Magnesium carbonate    |
| 60. | 100    | Tablets              | <10           | 100 - 200 mg | Only magnesium (or vitamin B6) | Magnesium citrate      |
| 61. | 100    | Tablets              | from 10 to 20 | 100 - 200 mg | Only magnesium (or vitamin B6) | Magnesium carbonate    |
| 62. | 101.25 | Powders              | <10           | 100 - 200 mg | Only magnesium (or vitamin B6) | Magnesium carbonate    |
| 63. | 102    | Tablets              | from 10 to 20 | 100 - 200 mg | Only magnesium (or vitamin B6) | Magnesium citrate      |
| 64. | 102    | Capsules             | <10           | 100 - 200 mg | Only magnesium (or vitamin B6) | Magnesium citrate      |
| 65. | 102    | Tablets              | from 10 to 20 | 100 - 200 mg | Only magnesium (or vitamin B6) | Magnesium citrate      |
| 66. | 102    | Tablets              | from 10 to 20 | 100 - 200 mg | Multicomponent preparations    | Magnesium citrate      |
| 67. | 110    | Coated tablets       | from 10 to 20 | 100 - 200 mg | Only magnesium (or vitamin B6) | Magnesium citrate      |
| 68. | 112.5  | Dragees              | >20           | 100 - 200 mg | Multicomponent preparations    | Several chemical forms |
| 69. | 120    | Tablets              | from 10 to 20 | 100 - 200 mg | Only magnesium (or vitamin B6) | Magnesium carbonate    |
| 70. | 120    | Effervescent tablets | from 10 to 20 | 100 - 200 mg | Only magnesium (or vitamin B6) | Magnesium carbonate    |
| 71. | 125    | Tablets              | <10           | 100 - 200 mg | Only magnesium (or vitamin B6) | Magnesium carbonate    |
| 72. | 125    | Effervescent tablets | <10           | 100 - 200 mg | Multicomponent preparations    | Magnesium carbonate    |
| 73. | 125    | Tablets              | from 10 to 20 | 100 - 200 mg | Only magnesium (or vitamin B6) | Magnesium citrate      |
| 74. | 125    | Tablets              | from 10 to 20 | 100 - 200 mg | Only magnesium (or vitamin B6) | Several chemical forms |
| 75. | 130    | Tablets              | <10           | 100 - 200 mg | Only magnesium (or vitamin B6) | Magnesium citrate      |

|     |       |                      |               |              |                                |                        |
|-----|-------|----------------------|---------------|--------------|--------------------------------|------------------------|
| 76. | 135   | Powders              | from 10 to 20 | 100 - 200 mg | Only magnesium (or vitamin B6) | Magnesium citrate      |
| 77. | 150   | Powders              | >20           | 100 - 200 mg | Only magnesium (or vitamin B6) | Magnesium citrate      |
| 78. | 150   | Effervescent tablets | from 10 to 20 | 100 - 200 mg | Only magnesium (or vitamin B6) | Magnesium citrate      |
| 79. | 150   | Effervescent tablets | from 10 to 20 | 100 - 200 mg | Multicomponent preparations    | Magnesium carbonate    |
| 80. | 150   | Tablets              | from 10 to 20 | 100 - 200 mg | Only magnesium (or vitamin B6) | Magnesium citrate      |
| 81. | 150   | Granulates           | from 10 to 20 | 100 - 200 mg | Only magnesium (or vitamin B6) | Magnesium citrate      |
| 82. | 150   | Tablets              | from 10 to 20 | 100 - 200 mg | Only magnesium (or vitamin B6) | Magnesium lactate      |
| 83. | 187.5 | Effervescent tablets | from 10 to 20 | 100 - 200 mg | Multicomponent preparations    | Magnesium carbonate    |
| 84. | 187.5 | Effervescent tablets | <10           | 100 - 200 mg | Only magnesium (or vitamin B6) | Magnesium carbonate    |
| 85. | 187.5 | Powders              | from 10 to 20 | 100 - 200 mg | Multicomponent preparations    | Magnesium citrate      |
| 86. | 187.5 | Tablets              | from 10 to 20 | 100 - 200 mg | Only magnesium (or vitamin B6) | Several chemical forms |
| 87. | 200   | Powders              | from 10 to 20 | 100 - 200 mg | Multicomponent preparations    | Magnesium citrate      |
| 88. | 200   | Effervescent tablets | <10           | 100 - 200 mg | Only magnesium (or vitamin B6) | Magnesium carbonate    |
| 89. | 200   | Effervescent tablets | from 10 to 20 | 100 - 200 mg | Only magnesium (or vitamin B6) | Magnesium lactate      |
| 90. | 200   | Tablets              | >20           | 100 - 200 mg | Only magnesium (or vitamin B6) | Several chemical forms |
| 91. | 200   | Powders              | from 10 to 20 | 100 - 200 mg | Only magnesium (or vitamin B6) | Several chemical forms |
| 92. | 200   | Tablets              | from 10 to 20 | 100 - 200 mg | Only magnesium (or vitamin B6) | Magnesium carbonate    |
| 93. | 225   | Tablets              | >20           | 100 - 200 mg | Multicomponent preparations    | Magnesium hydroxide    |
| 94. | 225   | Tablets              | >20           | 100 - 200 mg | Multicomponent preparations    | Magnesium citrate      |
| 95. | 300   | Powders              | >20           | Above 200 mg | Multicomponent preparations    | Magnesium citrate      |
| 96. | 300   | Effervescent tablets | <10           | Above 200 mg | Only magnesium (or vitamin B6) | Several chemical forms |
| 97. | 300   | Liquids              | <10           | Above 200 mg | Multicomponent preparations    | Several chemical forms |

|      |     |                      |               |              |                                |                        |
|------|-----|----------------------|---------------|--------------|--------------------------------|------------------------|
| 98.  | 300 | Liquids              | <10           | Above 200 mg | Multicomponent preparations    | Magnesium bisglycinate |
| 99.  | 362 | Powders              | >20           | Above 200 mg | Only magnesium (or vitamin B6) | Magnesium citrate      |
| 100. | 375 | Effervescent tablets | <10           | Above 200 mg | Only magnesium (or vitamin B6) | Magnesium carbonate    |
| 101. | 375 | Effervescent tablets | <10           | Above 200 mg | Only magnesium (or vitamin B6) | Several chemical forms |
| 102. | 375 | Powders              | from 10 to 20 | Above 200 mg | Only magnesium (or vitamin B6) | Magnesium citrate      |
| 103. | 375 | Liquids              | <10           | Above 200 mg | Only magnesium (or vitamin B6) | Magnesium bisglycinate |
| 104. | 375 | Liquids              | <10           | Above 200 mg | Only magnesium (or vitamin B6) | Magnesium citrate      |
| 105. | 375 | Capsules             | <10           | Above 200 mg | Only magnesium (or vitamin B6) | Magnesium oxide        |
| 106. | 375 | Capsules             | <10           | Above 200 mg | Only magnesium (or vitamin B6) | Magnesium oxide        |
| 107. | 375 | Powders              | >20           | Above 200 mg | Only magnesium (or vitamin B6) | Magnesium citrate      |
| 108. | 375 | Tablets              | from 10 to 20 | Above 200 mg | Only magnesium (or vitamin B6) | Magnesium citrate      |
| 109. | 375 | Effervescent tablets | <10           | Above 200 mg | Only magnesium (or vitamin B6) | Magnesium carbonate    |
| 110. | 375 | Effervescent tablets | <10           | Above 200 mg | Only magnesium (or vitamin B6) | Several chemical forms |
| 111. | 375 | Effervescent tablets | from 10 to 20 | Above 200 mg | Only magnesium (or vitamin B6) | Several chemical forms |
| 112. | 375 | Tablets              | <10           | Above 200 mg | Only magnesium (or vitamin B6) | Magnesium oxide        |
| 113. | 375 | Effervescent tablets | from 10 to 20 | Above 200 mg | Only magnesium (or vitamin B6) | Magnesium carbonate    |
| 114. | 400 | Capsules             | >20           | Above 200 mg | Only magnesium (or vitamin B6) | Several chemical forms |
| 115. | 400 | Tablets              | from 10 to 20 | Above 200 mg | Multicomponent preparations    | Magnesium oxide        |
| 116. | 400 | Tablets              | <10           | Above 200 mg | Only magnesium (or vitamin B6) | Magnesium citrate      |
